# Supplementary material
Source: publisher figshare collection journal article supplement (https://acs.figshare.com/ndownloader/files/4440178)
Supplement: Supplementary file 1 [file 4440178]

# Na<sub>2</sub>SO<sub>4</sub> monocrystal nanowires—aspect ratio control and electron beam radiolysis

Ruiting Zheng, Jinwei Gao, Tengfei Yang, Yucheng Lan, Guoan Cheng, Dezhi Wang, Zhifeng Ren, and Gang Chen\*

\*To whom correspondence should be addressed. E-mail: gchen2@mit.edu

## includes:

Table S1 The synthesis conditions and the products  
Fig. S1-S3

| Table S1 The synthesis conditions and the products |                                                                                                           |    |               |              |              |
|----------------------------------------------------|-----------------------------------------------------------------------------------------------------------|----|---------------|--------------|--------------|
| No.                                                | Reactants                                                                                                 | pH | Products      | Diameter(nm) | Aspect ratio |
| 1                                                  | 0.005M CuSO <sub>4</sub><br>+0.02MNaBH <sub>4</sub><br>+1 mmol PVP                                        | 7  | Nanorods      | 20-50        | 9-15         |
| 2                                                  | 0.01M CuSO <sub>4</sub><br>+0.04MNaBH <sub>4</sub><br>+1 mmol PVP                                         | 7  | Nanowiskers   | 70-120       | 19-33        |
| 3                                                  | 0.01M CuSO <sub>4</sub><br>+0.04MNaBH <sub>4</sub><br>+1 mmol PVP                                         | 3  | Nanowires     | 100-300      | Exceed 100   |
| 4                                                  | 0.01M CuSO <sub>4</sub><br>+0.04MNaBH <sub>4</sub><br>+1 mmol PVP<br>+ two drops of<br>0.1M NaCl solution | 7  | Nanowires     | 150-400      | Exceed 100   |
| 5                                                  | 0.01M H <sub>2</sub> SO <sub>4</sub><br>+0.02M NaOH                                                       | 7  | Nanorods      | 15-40        | Less than 10 |
| 6                                                  | 0.01M CuSO <sub>4</sub><br>+0.04MNaBH <sub>4</sub>                                                        | 7  | Nanorods      | 30-65        | 10-20        |
| 7                                                  | 0.02M CuSO <sub>4</sub><br>+0.08MNaBH <sub>4</sub><br>+4 mmol PVP                                         | 7  | Sub-microrods | 150-600      | 6-15         |

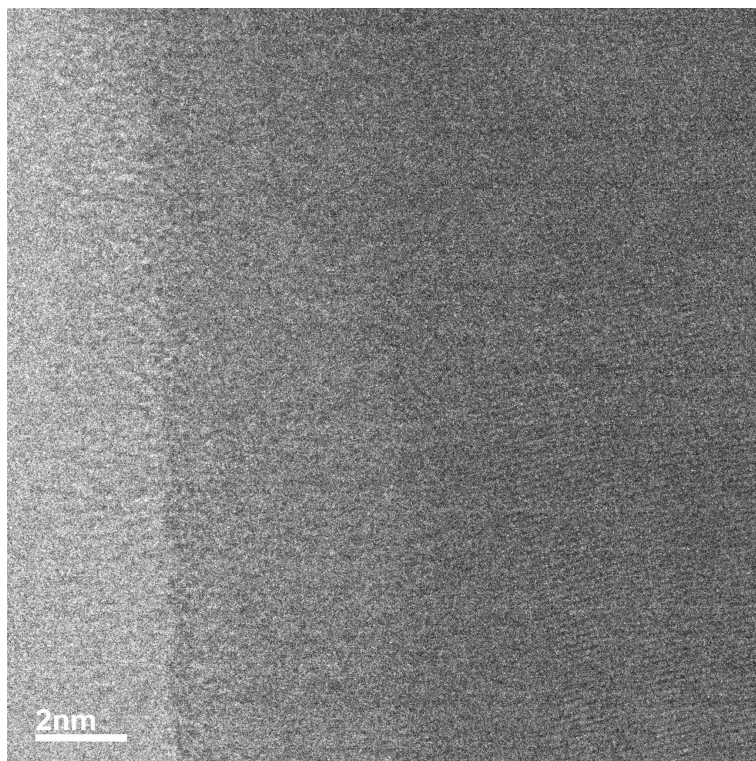

Figure S1 HRTEM image of the shell structure of a  $\text{Na}_2\text{SO}_4$  sub-microrod. It could be observed that the shell of  $\text{Na}_2\text{SO}_4$  sub-microrod is crystalline  $\text{Na}_2\text{SO}_4$  coated with 2~5nm amorphous PVP.

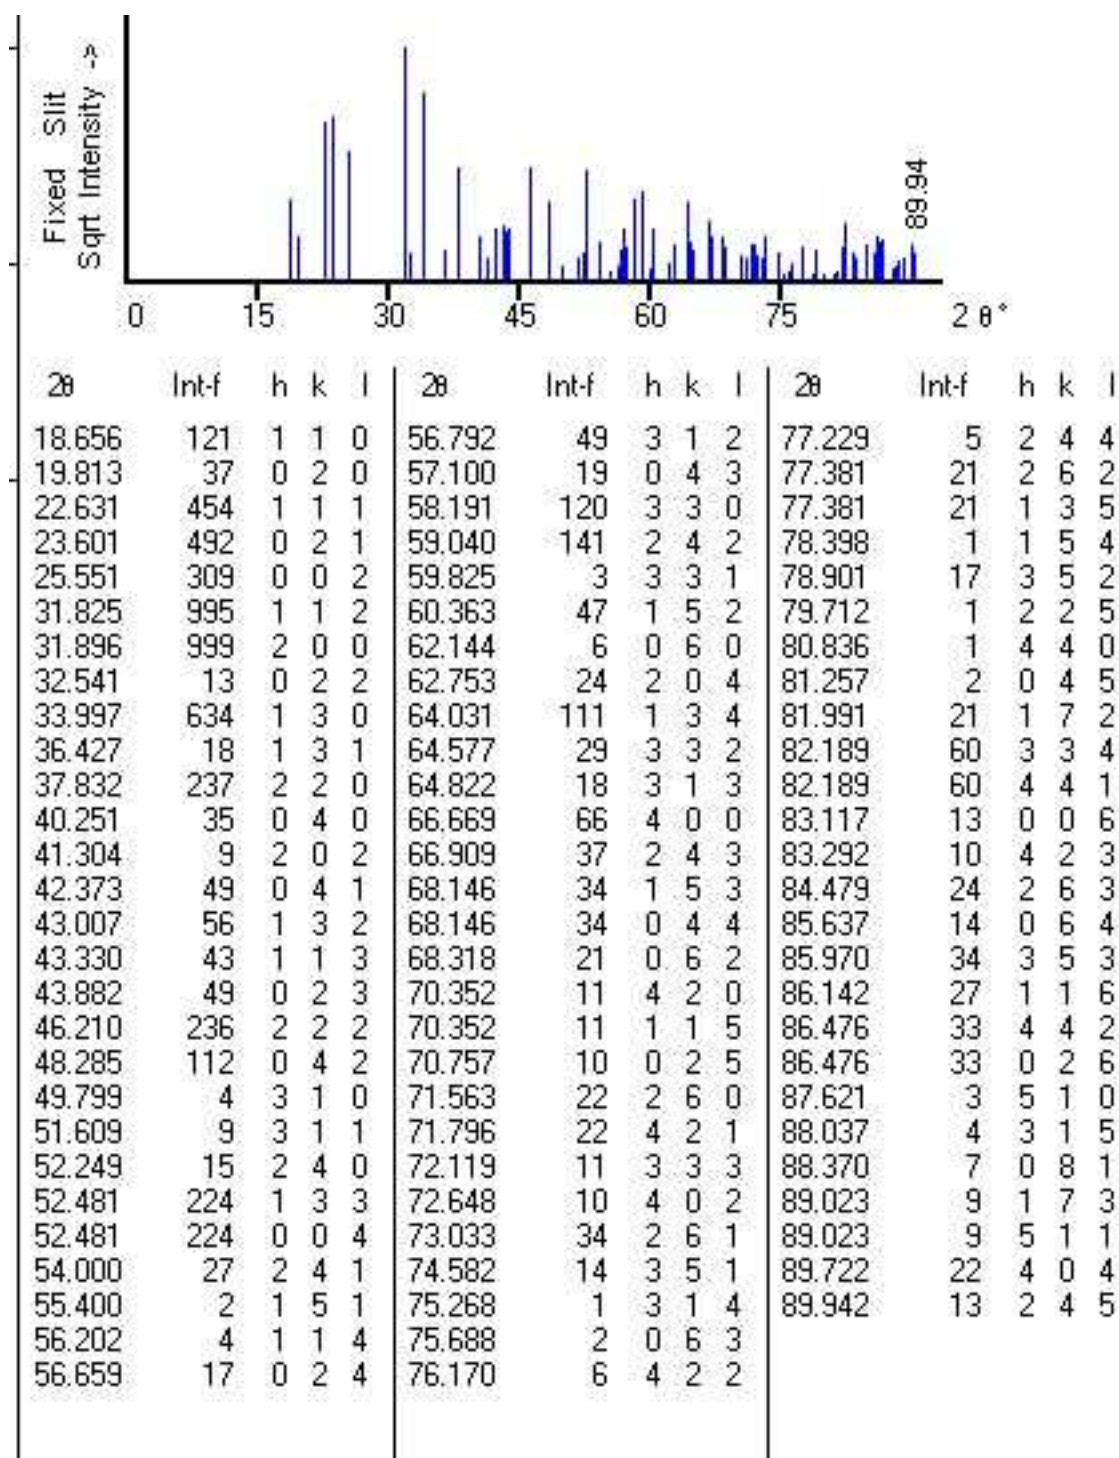

Figure S2. The JCPDS patterns and diffraction data of  $\text{Na}_2\text{SO}_4$

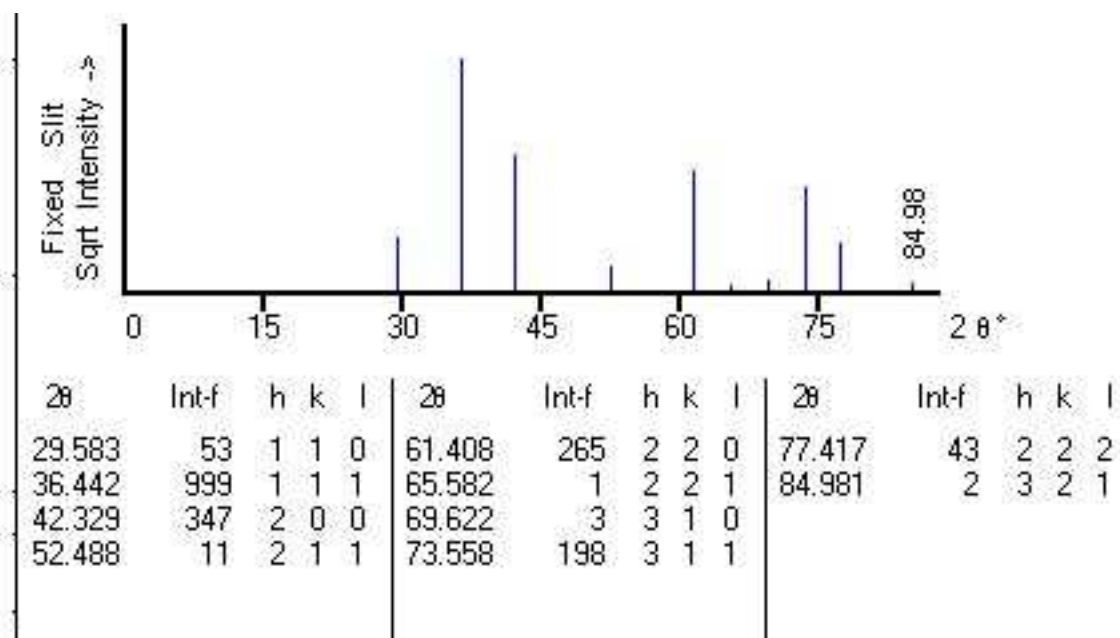

Figure S3. The JCPDS patterns and diffraction data of  $\text{Cu}_2\text{O}$
